# Supplementary material
Source: publisher figshare collection journal article supplement (https://gsajournals.figshare.com/ndownloader/files/14951156)
Supplement: Supplementary file 1 [file 14951156]

## Sheet: IC50
DHFR species and context	Term	Estimate
DHFR-Ec, WT	L28R	0.328279
	P21L	0
	A26T	0
	P21L:A26T	0
	P21L:L28R	0
	A26T:L28R	0
	P21L:A26T:L28R	0
DHFR-Lg, WT	P21L	0
	A26T	0
	L28R	0
	P21L:A26T	0
	P21L:L28R	0
	A26T:L28R	0
	P21L:A26T:L28R	0
DHFR-Cm, WT	L28R	0.918922
	P21L	-0.529002
	A26T	0
	P21L:A26T	0
	P21L:L28R	0
	A26T:L28R	0
	P21L:A26T:L28R	0
DHFR-Ec, GroEL	P21L:A26T	1.84802
	A26T	-1.13821
	P21L:A26T:L28R	-0.964976
	A26T:L28R	0.927098
	L28R	0.634683
	P21L	-0.221065
	P21L:L28R	0
DHFR-Lg, GroEL	A26T:L28R	1.30028
	P21L:L28R	-1.14783
	A26T	-0.739934
	L28R	0.503178
	P21L:A26T	0.366165
	P21L	0.19895
	P21L:A26T:L28R	0
DHFR-Cm, GroEL	L28R	0.775533
	P21L	-0.559309
	A26T	0
	P21L:A26T	0
	P21L:L28R	0
	A26T:L28R	0
	P21L:A26T:L28R	0
DHFR-Ec, lon	A26T	-1.34017
	A26T:L28R	1.20871
	P21L:A26T	0.962286
	L28R	0.725545
	P21L:A26T:L28R	-0.421942
	P21L	-0.112952
	P21L:L28R	0
DHFR-Lg, lon	P21L:A26T	-1.15155
	L28R	0.707234
	A26T	-0.569677
	A26T:L28R	0.30504
	P21L	0.20362
	P21L:A26T:L28R	-0.0183163
	P21L:L28R	0
DHFR-Cm, lon	P21L	-1.15936
	L28R	1.12468
	P21L:A26T	0.751049
	P21L:A26T:L28R	0.276503
	A26T	-0.242918
	P21L:L28R	0.152293
	A26T:L28R	0.144438

## Sheet: Abundance
DHFR species and context	Term	Estimate
DHFR-Ec, WT	A26T:L28R	-0.535289
	L28R	0.340163
	P21L:A26T	-0.308316
	A26T	-0.231275
	P21L	0.0655184
	P21L:L28R	0
	P21L:A26T:L28R	0
DHFR-Lg, WT	A26T:L28R	2.17818
	P21L:L28R	1.14601
	A26T	-1.05241
	P21L:A26T:L28R	-0.986967
	P21L:A26T	-0.632556
	L28R	-0.529768
	P21L	0.498012
DHFR-Cm, WT	L28R	0.326957
	P21L	0
	A26T	0
	P21L:A26T	0
	P21L:L28R	0
	A26T:L28R	0
	P21L:A26T:L28R	0
DHFR-Ec, GroEL	P21L	0
	A26T	0
	L28R	0
	P21L:A26T	0
	P21L:L28R	0
	A26T:L28R	0
	P21L:A26T:L28R	0
DHFR-Lg, GroEL	A26T:L28R	1.61603
	A26T	-0.906151
	P21L:L28R	0.411458
	P21L:A26T	-0.332871
	P21L	0.31082
	L28R	0.0468782
	P21L:A26T:L28R	0
DHFR-Cm, GroEL	L28R	0.338611
	P21L	0
	A26T	0
	P21L:A26T	0
	P21L:L28R	0
	A26T:L28R	0
	P21L:A26T:L28R	0
DHFR-Ec, lon	L28R	0.525868
	A26T	-0.500265
	P21L	0
	P21L:A26T	0
	P21L:L28R	0
	A26T:L28R	0
	P21L:A26T:L28R	0
DHFR-Lg, lon	A26T:L28R	1.54625
	A26T	-0.856445
	P21L	0.306531
	P21L:L28R	0.186625
	L28R	0
	P21L:A26T	0
	P21L:A26T:L28R	0
DHFR-Cm, lon	P21L:A26T:L28R	-1.05821
	P21L:A26T	1.02948
	P21L:L28R	0.977385
	L28R	0.65975
	A26T	-0.436723
	P21L	-0.350386
	A26T:L28R	0
